# Supplementary material for: Rtf1-dependent transcriptional pausing regulates cardiogenesis
Source: eLife journal article supplement (doi:10.7554/elife.94524), 2024-02-02
Supplement: fig1-data1 [file Figure 1 Source Data 1.pdf › Figure 1 Source Data 1.pdf]

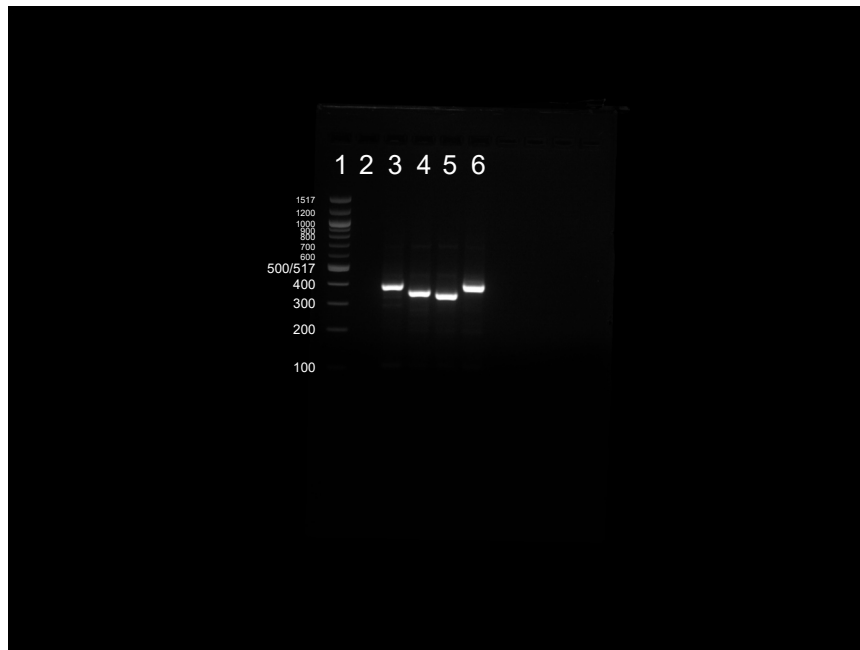

Lanes:

1: NEB 100 bp Ladder (bp labeled to the left)

2: Intentionally left empty

3: Product from rtf1-e3-F and rtf1-e3-R primer PCR on gDNA from wild type sibling of rtf1 mutant in Lane 4.

4: Product from rtf1-e3-F and rtf1-e3-R primer PCR on gDNA from rtf1 LA2678 mutant.

5: Product from rtf1-e3-F and rtf1-e3-R primer PCR on gDNA from rtf1 LA2679 mutant.

6: Product from rtf1-e3-F and rtf1-e3-R primer PCR on gDNA from wild type sibling of rtf1 mutant in Lane 5.
