# Supplementary material for: Rtf1-dependent transcriptional pausing regulates cardiogenesis
Source: eLife journal article supplement (doi:10.7554/elife.94524), 2024-02-02
Supplement: fig1-data3 [file Figure 1 Source Data 3.pdf › Figure 1 Source Data 3.pdf]

40.256 second exposure

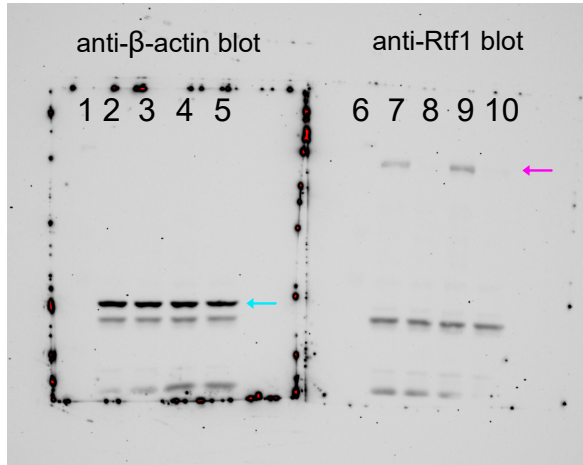

267.176 second exposure

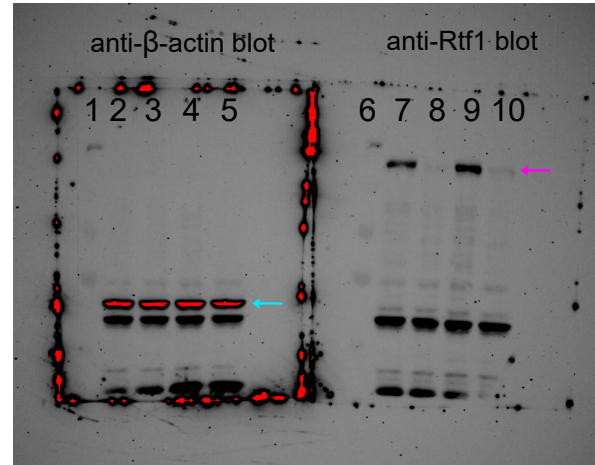

← Cyan arrow indicates β-actin protein.

← Magenta arrow indicates Rtf1 protein.

Lanes:

1: Spectra Multicolor Broad Range Protein Ladder (bands too light to accurately label molecular weights)

2: Protein lysate of wildtype siblings of *rtf1* mutants in Lane 3.

3: Protein lysate of *rtf1* LA2678 mutants.

4: Protein lysate of wildtype siblings of *rtf1* mutants in Lane 5.

5: Protein lysate of *rtf1* LA2679 mutants.

6: Spectra Multicolor Broad Range Protein Ladder (bands too light to accurately label molecular weights)

7: Protein lysate of wildtype siblings of *rtf1* mutants in Lane 8.

8: Protein lysate of *rtf1* LA2678 mutants.

9: Protein lysate of wildtype siblings of *rtf1* mutants in Lane 10.

10: Protein lysate of *rtf1* LA2679 mutants.
