# Supplementary material for: Rtf1-dependent transcriptional pausing regulates cardiogenesis
Source: eLife journal article supplement (doi:10.7554/elife.94524), 2024-02-02
Supplement: fig4-data1 [file Figure 4 Source Data 1.pdf › Figure 4 Source Data 1.pdf]

anti-Rtf1 and anti- $\beta$ -actin combined Western blot

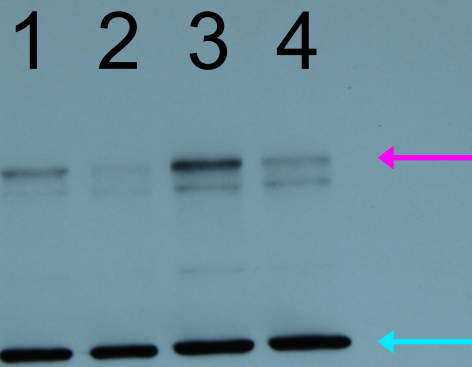

← Cyan arrow indicates  $\beta$ -actin protein.

← Magenta arrow indicates Rtf1 protein.

Lanes:

1: Protein lysate from Non-target shRNA-treated mESCs

2: Protein lysate from Rtf1 shRNA-treated mESCs

3: Protein lysate from Non-target shRNA-treated mESCs

4: Protein lysate from Rtf1 shRNA-treated mESCs
