# Supplementary material for: Rtf1-dependent transcriptional pausing regulates cardiogenesis
Source: eLife. 2026 Jan 15;13:RP94524. doi: 10.7554/eLife.94524 (PMC12807453; doi:10.7554/eLife.94524)
Supplement: Supplementary file 1. [file elife-94524-supp1.xlsx]

## Sheet: Sheet1 (2)
Gene	Forward Primer Sequence (5' to 3')	Reverse Primer Sequence (5' to 3')
Ppia (control)	GTCTCCTTCGAGCTGTTTGC	GATGCCAGGACCTGTATGCT
Brachyury	TGTGAGAGGTACCCAGCTCTAAGGAA	TATCATGGGACTGCAGCATGGACA
Ncam1	CATCATCTGGAAACACAAAGGCCGAG	GATCTGCAGGTAGTTGTTGGACAGGA
Afp	TGTCTGCAGGATGGGGAAAAAG	GCCATTCTCTGCGTGAATTATG
Nkx2-5	TGCGCTCACACCCACGCCTTTCTCA	CCAGACGCCAGGCTACGCTGCT
Myh6	CACTCAATGAGACGGTGGTG	GTGGGTGGTCTTCAGGTTTG
Nppa	TACAGTGCGGTGTCCAACACAGAT	TGACCTCATCTTCTACCGGCATCTTC

## Sheet: Sheet1
Primer Name	Gene	Sequence (5' to 3')
mCyclophilinA-F1	Ppia	GTCTCCTTCGAGCTGTTTGC
mCyclophilinA-R1	Ppia	GATGCCAGGACCTGTATGCT
mBry-F3	Brachyury	TGTGAGAGGTACCCAGCTCTAAGGAA
mBry-R3	Brachyury	TATCATGGGACTGCAGCATGGACA
mNCAM-F3	Ncam1	CATCATCTGGAAACACAAAGGCCGAG
mNCAM-R3	Ncam1	GATCTGCAGGTAGTTGTTGGACAGGA
mAFP-F1	Afp	TGTCTGCAGGATGGGGAAAAAG
mAFP-R1	Afp	GCCATTCTCTGCGTGAATTATG
mnkx2.5-F2	Nkx2-5	TGCGCTCACACCCACGCCTTTCTCA
mnkx2.5-R2	Nkx2-5	CCAGACGCCAGGCTACGCTGCT
mMyh6-F1	Myh6	CACTCAATGAGACGGTGGTG
mMyh6-R1	Myh6	GTGGGTGGTCTTCAGGTTTG
mANF-F2	Nppa	TACAGTGCGGTGTCCAACACAGAT
mANF-R2	Nppa	TGACCTCATCTTCTACCGGCATCTTC
