# Supplementary material for: Rtf1-dependent transcriptional pausing regulates cardiogenesis
Source: eLife. 2026 Jan 15;13:RP94524. doi: 10.7554/eLife.94524 (PMC12807453; doi:10.7554/eLife.94524)
Supplement: Supplementary file 2. — Predicted identities were based on manual inspection of marker gene expression. [file elife-94524-supp2.xlsx]

## Sheet: Seurat Clusters
Seurat Cluster	Predicted Cell Type
0	Brain/CNS
1	Posterior Segmental Mesoderm
2	Hatching Gland cluster 1
3	Periderm cluster 1
4	Basal Cells cluster 1
5	Notochord cluster 1
6	Pre-somitic Paraxial Mesoderm
7	Periderm cluster 2
8	Basal Cells cluster 2
9	Lateral Plate Mesoderm
10	Forebrain
11	Neural tube/Neurons
12	Adaxial cells
13	Caudal Blood Island Precursors
14	Pharyngeal Mesenchyme
15	Optic Vesicle
16	Midbrain-hindbrain Boundary
17	Fast Muscle Precursors
18	Floorplate
19	Endothelial (high flt4)
20	Otic Placode
21	Pronephric Mesoderm
22	Pre-cardiac Mesoderm
23	Neural Crest
24	Somite cluster 1
25	Endoderm
26	Rostral Blood Island Precursors
27	Ionocyte / Mucus Cell Precursors
28	Epidermis
29	Neurons cluster 1
30	Endothelial (low flt4)
31	Notochord cluster 2
32	Neurons cluster 2
33	Notochord cluster 3
34	Yolk Syncytial Layer
35	Notochord cluster 4
36	Hatching Gland cluster 2
37	Notochord cluster 5
38	Somite cluster 2
